# Supplementary material for: Direct reuse of two deep-dewatered sludge cakes without a solidifying agent as landfill cover: geotechnical properties and heavy metal leaching characteristics
Source: Royal Society of Chemistry journal article supplement (doi:10.1039/c6ra26480h), 2017-01-01
Supplement: c6ra26480h1.pdf [file c6ra26480h1.pdf]

**Direct reuse of two deep-dewatered sludge cakes without  
solidifying agent as landfill cover: Geotechnical properties and  
heavy metals leaching characteristics**

Jiakuan Yang <sup>a, b\*</sup>, Shinan Zhang <sup>a</sup>, Yafei Shi <sup>a, c\*</sup>, Chao Li <sup>a</sup>, Wenbo Yu <sup>a</sup>, Ruonan  
Guan <sup>a</sup>, Jun Xiao <sup>a</sup>, Sha Liang <sup>a</sup>, Jingping Hu <sup>a</sup>, Huijie Hou <sup>a</sup>, Jiukun Hu <sup>d</sup>

<sup>a</sup> *School of Environmental Science and Engineering, Huazhong University of Science  
and Technology, Wuhan, Hubei, 430074, P.R. China*

<sup>b</sup> *State Key Laboratory of Coal Combustion, Huazhong University of Science and  
Technology, Wuhan, Hubei, 430074, P.R. China*

<sup>c</sup> *School of Civil Engineering, Architecture and Environment, Hubei University of  
Technology, Wuhan 430068, Hubei, P.R. China*

<sup>d</sup> *Dongjiang Environmental Co., Ltd., Shenzhen, Guangdong, 518057, P.R. China*

\* Corresponding authors. Tel.: +86 27 87792102; Fax: +86 27 87792101

E-mail addresses: jkyang@hust.edu.cn (Prof. Jiakuan Yang); yfshi@hust.edu.cn (Dr.  
Yafei Shi)

**Table S1** Chemical compositions of the skeleton builders (wt.%)

| Skeleton builders | SiO <sub>2</sub> | CaO  | Al <sub>2</sub> O <sub>3</sub> | MgO | Na <sub>2</sub> O+K <sub>2</sub> O | Fe <sub>2</sub> O <sub>3</sub> | SO <sub>3</sub> | Cl <sup>-</sup> | LOI <sup>a</sup> |
|-------------------|------------------|------|--------------------------------|-----|------------------------------------|--------------------------------|-----------------|-----------------|------------------|
| Quick lime        | 7.2              | 62.0 | -                              | 1.7 | -                                  | -                              | -               | -               | 24.1             |
| Red mud           | 20.4             | 12.9 | 24.5                           | 1.0 | 12.3                               | 9.5                            | 0.7             | 0.1             | 4.0              |

<sup>a</sup>LOI = loss of ignition at 1200 °C.

Reference from the previous research (Li et al., 2015):

Li, C., Zhang, S., Yang, J., Shi, Y., Yu, W., Liang, S., Song, J., Xu, Q., Chen, Y., Hu, J., Li, Y., Yang, C., 2015. Distribution and speciation of heavy metals in two different sludge composite conditioning and deep-dewatering processes. RSC Adv. 5, 102332-102339.

**Table S2** The scheme of sludge conditioning (DS = dry solid)

| Conditioning system | Reagent dosage                                                                                                                    |                             | Conditioning method                                                                                                                                                                                    |
|---------------------|-----------------------------------------------------------------------------------------------------------------------------------|-----------------------------|--------------------------------------------------------------------------------------------------------------------------------------------------------------------------------------------------------|
|                     | Chemical agents                                                                                                                   | Skeleton builders           |                                                                                                                                                                                                        |
| Fe-Lime             | FeCl <sub>3</sub><br>(50 mg/g DS)                                                                                                 | Quick lime<br>(500 mg/g DS) | Quick lime (rapid mixing/15 min) →<br>FeCl <sub>3</sub> (slow mixing/5 min)                                                                                                                            |
| Fenton-RM           | H <sub>2</sub> SO <sub>4</sub><br>(adjust pH to 5)<br>Fe <sup>2+</sup> (32 mg/g DS)<br>H <sub>2</sub> O <sub>2</sub> (34 mg/g DS) | Red mud<br>(275 mg/g DS)    | H <sub>2</sub> SO <sub>4</sub> (rapid mixing /3 min) → Fe <sup>2+</sup><br>solutions (rapid mixing /3 min) →<br>H <sub>2</sub> O <sub>2</sub> (slow mixing /30 min) → red<br>mud (slow mixing /10 min) |

Reference from the previous research (Li et al., 2015):

Li, C., Zhang, S., Yang, J., Shi, Y., Yu, W., Liang, S., Song, J., Xu, Q., Chen, Y., Hu, J., Li, Y.,

Yang, C., 2015. Distribution and speciation of heavy metals in two different sludge composite

conditioning and deep-dewatering processes. RSC Adv. 5, 102332-102339..

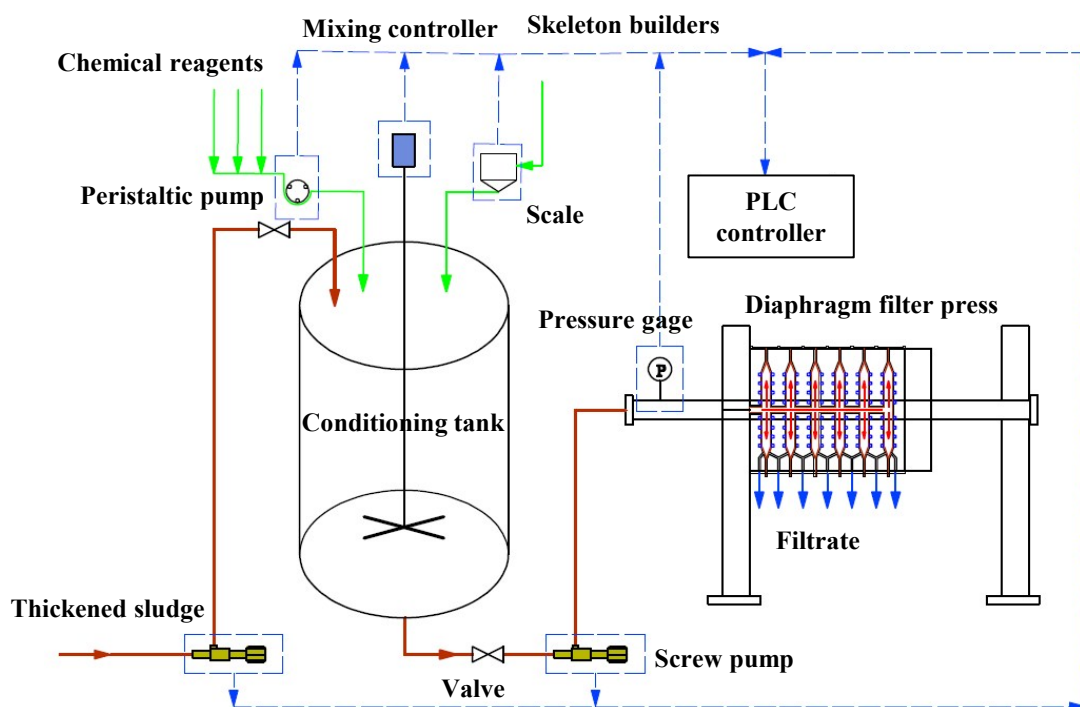

**Fig. S1** Process flow diagram of conditioning and dewatering.

Reference from the previous research (Li et al., 2015):

Li, C., Zhang, S., Yang, J., Shi, Y., Yu, W., Liang, S., Song, J., Xu, Q., Chen, Y., Hu, J., Li, Y., Yang, C., 2015. Distribution and speciation of heavy metals in two different sludge composite conditioning and deep-dewatering processes. *RSC Adv.* 5, 102332-102339..

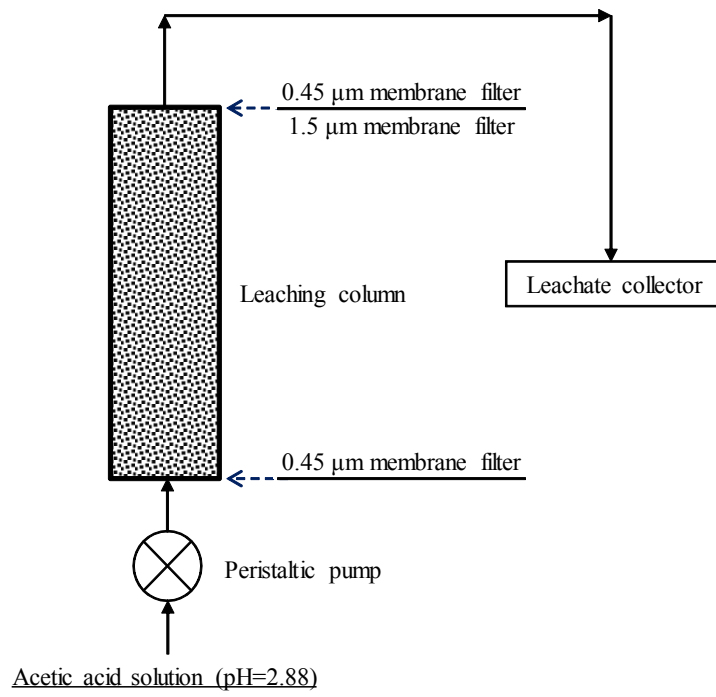

**Fig. S2** The schematic of the column leaching test.
